# Supplementary material
Source: PubMed Central journal article supplement (PMC5438753)
Supplement: NIHMS849041-supplement-4.pdf [file NIHMS849041-supplement-4.pdf]

## **DETAILS OF CRIMINAL JUSTICE COST CALCULATION**

Authors estimated the annual cost of police and judicial services attributable to sexual violence as the proportion of rape arrests among total arrests ( $n=21,007/11,205,833$ , or 0.2% each, Table 2).<sup>1</sup> For the attributable cost of corrections, authors first estimated the simple average annual per-capita cost for the total corrections population (i.e., jail, prison, parole, and probation)<sup>2,3</sup> (\$11,641 in 2012 USD, Table 2). Authors then estimated the average number of years that a convicted sexual violence perpetrator spends in the corrections population (i.e., 7.4 years, based on the proportion of perpetrators sentenced to probation, jail, or prison and parole)<sup>4-11</sup> (Table 2).

Authors calculated the discounted lifetime cost of corrections for sexual violence offenses per perpetrator based on that average corrections term and the annual average per-capita spending for the corrections population (\$78,603 in 2012 USD, Table 2). Only a small proportion of sexual violence offenses result in conviction; existing estimates range from 0.2-5.2%.<sup>12</sup> Using NISVS data on the annual number of female ( $n=1,929,000$ )<sup>13</sup> and male ( $n=219,000$ )<sup>14</sup> rape victims, the annual number of rape offenses known to law enforcement ( $n=108,612$ , Table 2),<sup>15</sup> the estimated proportion of those annual known offenses resulting in arrest and prosecution (i.e., cleared) (40.6%),<sup>16</sup> and the estimated proportion of those cleared offenses resulting in conviction (68%),<sup>8</sup> authors estimated 1.4% of completed or attempted rape victims have a perpetrator convicted (Tables 1-2). Authors divided the annual total estimated U.S. government criminal justice cost of sexual violence (\$2.7 billion in 2012 USD) by the estimated number of convicted perpetrators, resulting in a per-convicted perpetrator discounted lifetime criminal justice cost of \$93,105 (as 2014 USD in Table 1, inflated from 2012 USD value of \$90,130 in Table 2). An alternative presentation of these results is the discounted lifetime cost per victim, which is an estimated \$1,258 (as 2012 USD, calculated as the annual total estimated U.S. government

**Appendix**  
**Lifetime Economic Burden of Rape Among U.S. Adults**  
**Peterson et al.**

criminal justice cost of sexual violence of \$2.7 billion divided by the sum of annual rape victims, or  $1,929,000 + 219,000 = 2,148,000$  (or, \$1,300 as 2014 USD<sup>17</sup>, demonstrated in Table 1).

The estimated per-offense cost of criminal justice in a recent study was \$26,479 (2008 USD, or \$29,008 as 2014 USD<sup>17</sup>), compared to this study's estimate of \$1,300 (Table 1) per-victim. The previous study assessed a per-offense cost of criminal justice activities based on the number of rape offenses known to law enforcement, while this study used survey data (i.e., 2011 NISVS) that included both reported and unreported rape offenses. For a direct comparison of this study's estimate to the previous estimate, one can apply the number of rape offenses known to law enforcement (i.e., a much smaller denominator), and this study's per-victim criminal justice cost estimate becomes \$25,705 (2014 USD).

The top-down approach to criminal justice accounting by crime the authors—and the referenced previous study—employed is comprehensive but does not facilitate, for example, specific investigation of rape victims' services spending, and does not allow authors to eliminate or re-classify spending on individual elements; for example, civil court proceedings.<sup>18</sup> This approach also does not account for public criminal justice expenditures outside of dedicated budgets, which may be substantial,<sup>19</sup> nor non-public expenditures on related activities.

## REFERENCES

1. U.S. Federal Bureau of Investigation. Table 29. Estimated number of arrests, Rape - revised definition. Crime in the United States 2013. Washington, DC: U.S. Department of Justice; 2013.
2. U.S. Department of Justice. Table 1. Estimated number of persons supervised by adult correctional systems, by correctional status, 2000, 2005, and 2010–2013. Correctional Populations in the United States, 2013, NCJ 248479. Washington, DC; 2014.
3. U.S. Department of Justice. Table 1. Percent distribution of expenditure for the justice system by type of government, fiscal 2012. Justice Expenditure and Employment Extracts, NCJ 248628. Washington, DC: U.S. Department of Justice; 2015.
4. U.S. Department of Justice. Table 6.58.2003. Time served to first release by Federal prisoners by offense, United States. Compendium of Federal Justice Statistics, NCJ 210299. Available through Sourcebook of Criminal Justice Statistics Online. Washington, DC; 2003.
5. U.S. Department of Justice. Table 6.0023.2013. Prisoners under the jurisdiction of the Federal Bureau of Prisons by adjudication status, type of offense, and sentence length, selected years 1990-2013. Federal Bureau of Prisons, State of the Bureau. Available through Sourcebook of Criminal Justice Statistics Online. Washington, DC; 2003.
6. U.S. Department of Justice. Table 6. Length of sentence and time expected to be served of inmates sentenced to jail, by offense, 2002. Profile of Jail Inmates, NCJ 201932. Washington, DC; 2004.
7. U.S. Department of Justice. Table 1.3. Mean state prison sentence and estimated time to be served in prison, by offenses, 2004. Bureau of Justice Statistics, State Court Sentencing of Convicted Felons, Statistical Tables, NCJ 217995. Washington, DC; 2007.
8. U.S. Department of Justice. Table 21. Adjudication outcome for felony defendants in the 75 largest counties, by most serious arrest charge. Felony Defendants in Large Urban Counties, 2009 - Statistical Tables, NCJ 243777; 2013.
9. U.S. Department of Justice. Table 14. Estimated sentenced prisoners under state jurisdiction, by offense and sex, race, and Hispanic origin, December 31, 2012. Survey of Inmates in State Correctional Facilities. Bureau of Justice Statistics, National Prisoner Statistics Program, National Corrections Reporting Program. Washington, DC; 2014.
10. U.S. Department of Justice. Table 6. Rate of parole exits, by type of exit, 2008–2013. Probation and Parole in the United States, NCJ 248029. Washington, DC; 2014.
11. U.S. Department of Justice. Table 3. Rate of probation exits, by type of exit, 2008–2013. Probation and Parole in the United States, 2013, NCJ 248029. Washington, DC; 2014.
12. Lonsway KA, Archambault J. The "justice gap" for sexual assault cases: future directions for research and reform. *Violence Against Women*. 2012;18(2):145-168.  
<http://dx.doi.org/10.1177/1077801212440017>.
13. Breiding MJ, Smith SG, Basile KC, Walters ML, Chen J, Merrick MT. Prevalence and characteristics of sexual violence, stalking, and intimate partner violence victimization--national intimate partner and sexual violence survey, United States, 2011. *MMWR Surveill Summ*. 2014;63(8):1-18.
14. Smith SG, Chen J, Basile KC, et al. The National Intimate Partner and Sexual Violence Survey (NISVS): 2010-2012 State Report (Unpublished). In. Atlanta, GA: U.S. Centers for Disease Control and Prevention; 2016.

**Appendix**  
**Lifetime Economic Burden of Rape Among U.S. Adults**  
**Peterson et al.**

15. U.S. Federal Bureau of Investigation. Table 7. Offense analysis - Rape - revised definition. Crime in the United States 2013. Washington, DC: U.S. Department of Justice; 2013.
16. U.S. Federal Bureau of Investigation. Table 25. Percent of Offenses Cleared by Arrest or Exceptional Means, Rape - revised definition. Crime in the United States 2013. Washington, DC: U.S. Department of Justice; 2013.
17. U.S. Bureau of Economic Analysis. Table 1.1.4. Price Indexes for Gross Domestic Product. December 22, 2015. Accessed December 28, 2015. [www.bea.gov/itable/](http://www.bea.gov/itable/).
18. U.S. Department of Justice. Justice Expenditure and Employment Extracts, NCJ 248628: JEE Extracts definitions of Terms and Concepts. Washington, DC: U.S. Department of Justice; 2015.
19. Henrichson C, Delaney R. *The Price of Prisons: What Incarceration Costs Taxpayers*. New York: Vera Institute of Justice; 2012.
